# Supplementary material for: Silver nanocluster-lightened hybridization chain reaction
Source: Royal Society of Chemistry journal article supplement (doi:10.1039/c6ra09337j), 2016-01-01

## **Electronic Supplementary Information**

### **Silver nanocluster-lightened hybridization chain reaction**

Lin Liu, Qing Li, Li-Juan Tang\*, Ru-Qin Yu, Jian-Hui Jiang\*

State Key Laboratory of Chemo/Biosensing and Chemometrics, College of Chemistry  
and Chemical Engineering, Hunan University, Changsha 410082, P. R. China

Table S1. Sequences of synthesized oligonucleotides.<sup>a</sup>

| RNA or DNA            | Sequence (5' - 3')                                                                                            |
|-----------------------|---------------------------------------------------------------------------------------------------------------|
| mRNA target           | UCU CAA GGA CCA CCG CAU CUC UAC                                                                               |
| Nonhomologous RNA     | AGU CUA GGA UUC GGC GUG GGU UAA GGU UAA                                                                       |
| mRNA-1                | UCU CAA GGA CCA CCG CAU C <u>A</u> C UAC                                                                      |
| mRNA-2                | UCU CAA GGA CCA CCG CAU CAC <u>A</u> AC                                                                       |
| mRNA-3                | UCU CAA GGA CCA CCG CAU CUG <u>U</u> AC                                                                       |
| mRNA-4                | UCU CAA GGA CCA CCG CAU CUC U <u>A</u> G                                                                      |
| Hairpin probe H1      | GTA GAG ATG CGG TGG TCC TTG AGA CAA AGT<br>TCT CAA GGA CCA CCG CAT AAG ATA GGG TGG<br>GGT GGG GTG GGG         |
| Hairpin probe H2      | TCT CAA GGA CCA CCG CAT AAT TGG ATG CGG<br>TGG TCC TTG AGA ACT TTG<br>GTC TTA TAG CTA TTT CCC GCA TGA ACT TCC |
| Hairpin probe H3      | AAT TAT GCG GTG GTC CTT GAG AGA GTC TTC<br>TCA AGG ACC ACC GCA T                                              |
| Hairpin probe H4      | TCT CAA GGA CCA CCG CAT CTC TAC ATG CGG<br>TGG TCC TTG AGA AGA CTC                                            |
| AgNC-templating probe | CCC TTA ATC CCC TAT TTC ATG CGG GAA ATA<br>GCT ATA AGA C                                                      |

<sup>a</sup> mRNA target is the initiator for HCR reaction among probes H1-H4. mRNA-1, mRNA-2, mRNA-3 and mRNA-4 with single base diverse from the mRNA target at diverse sites, as well as nonhomologous RNA are used in the control experiments. AgNC-templating probe is used for the synthesis of nucleic-acid-stabilized silver nanoclusters (DNA-AgNCs).

**Figure S1.** Typical high response transmission electron microscopy (HRTEM) image of nucleic-acid-stabilized silver nanoclusters (DNA–AgNCs). Scale bar is 5 nm.

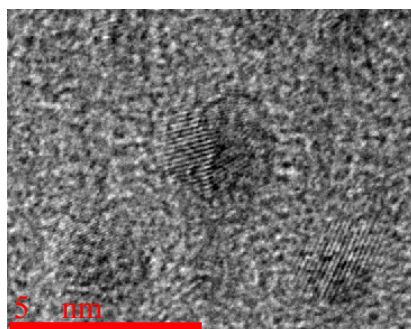

**Figure S2.** Atomic force microscopy (AFM) images and cross-section analysis of the HCR products before (A) and after (B) loading DNA–AgNCs. A 1/10 diluted solution was used for image B compared with that for image A.

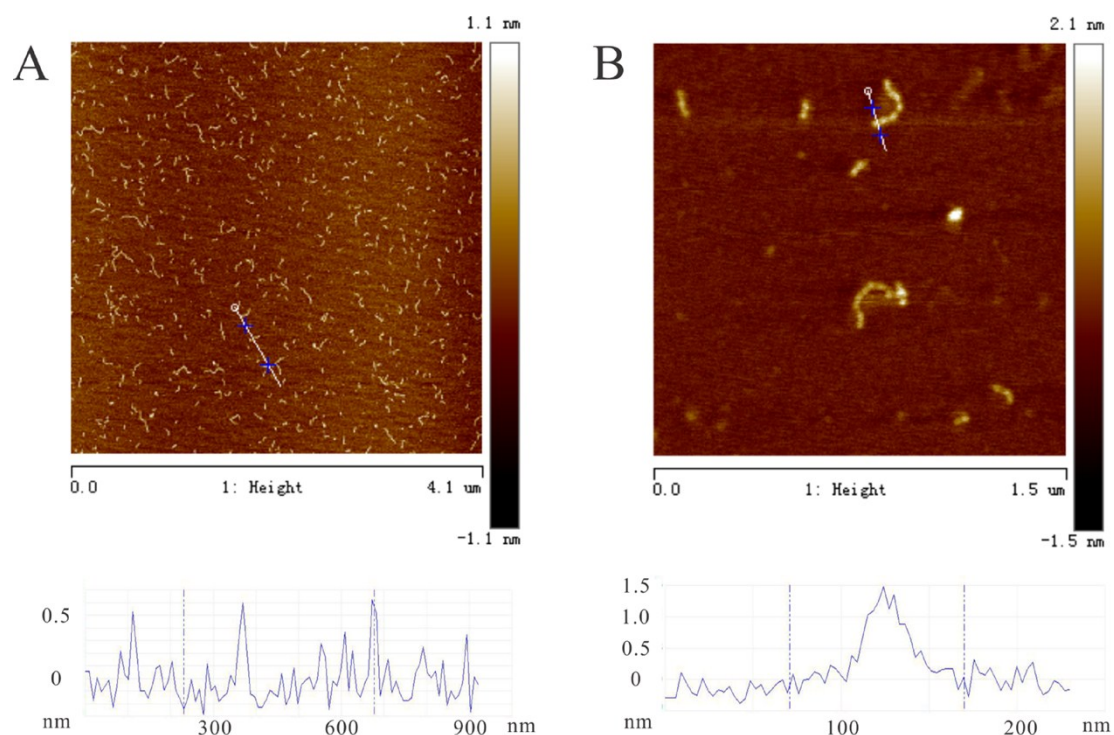

**Figure S3.** (A) Dependency of fluorescence signals on  $\text{Mg}^{2+}$  concentration. (B) Dependency of fluorescence intensity ratio ( $F/F_0$ ) values of mRNA assay on reaction temperature. Error bars are standard deviation of four repetitive experiments.

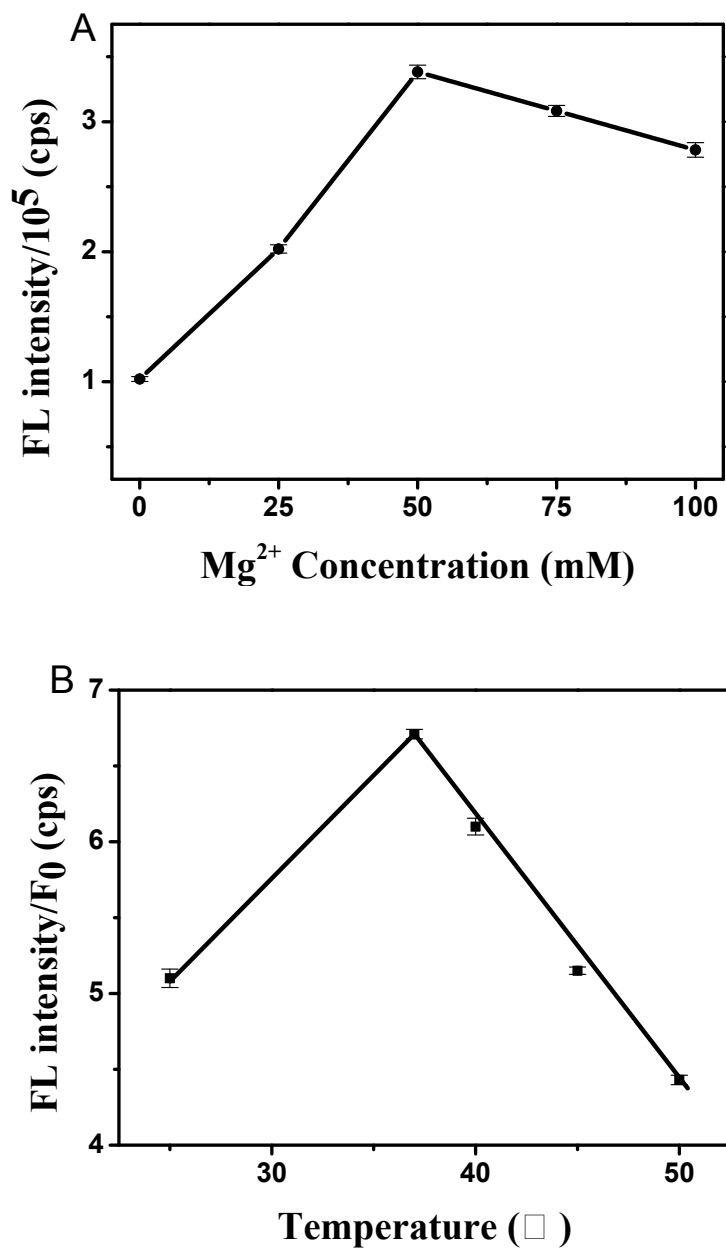

**Figure S4.** Specificity of AgNC-lightened HCR in mRNA assay. Bars represent the fluorescence intensity ratio ( $F/F_0$ ) upon the different mRNA targets with the same concentration of 100 nM, where  $F_0$  and  $F$  are the fluorescence signals in the absence and the presence of mRNA, respectively. Error bars are the standard deviation of four repetitive experiments.

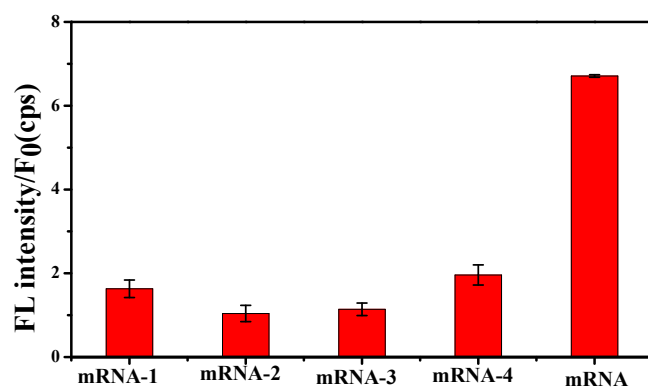

Supplement: c6ra09337j1.pdf [file c6ra09337j1.pdf]
